# Supplementary material for: The Tissue Architecture of Oral Squamous Cell Carcinoma Visualized by Staining Patterns of Wheat Germ Agglutinin and Structural Proteins Using Confocal Microscopy
Source: MDPI journal article supplement (doi:10.3390/cells10092466), 2021-09-18
Supplement: s1 [file s1]

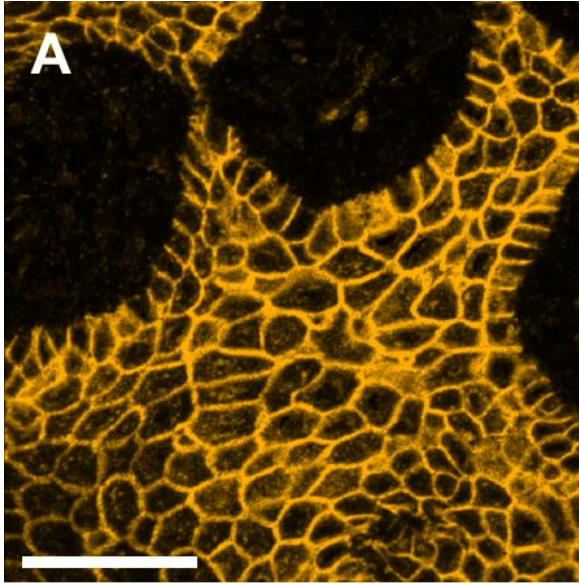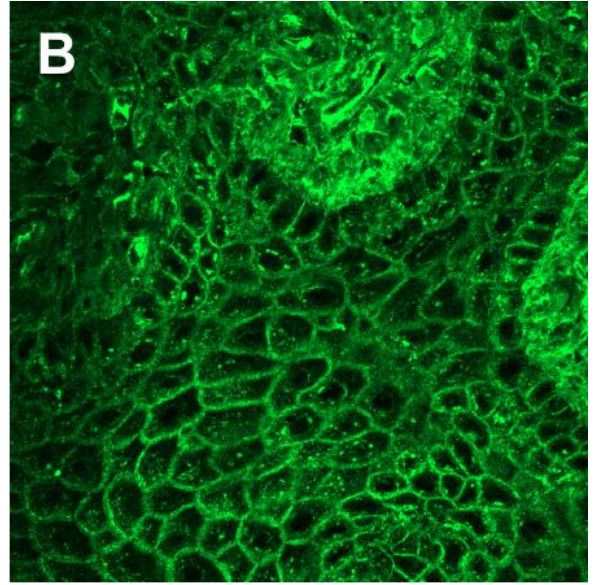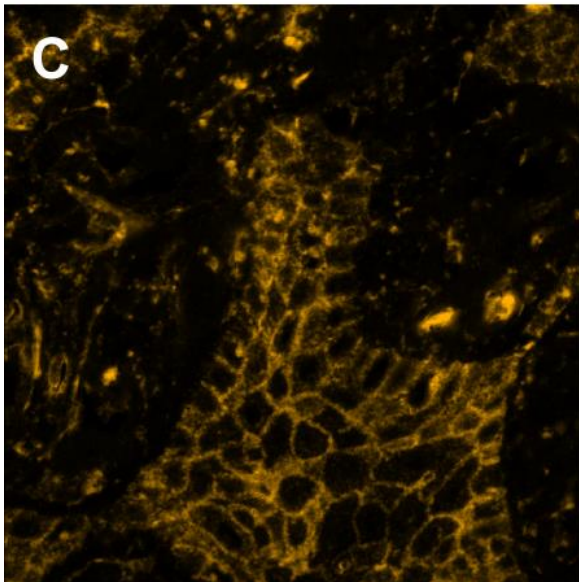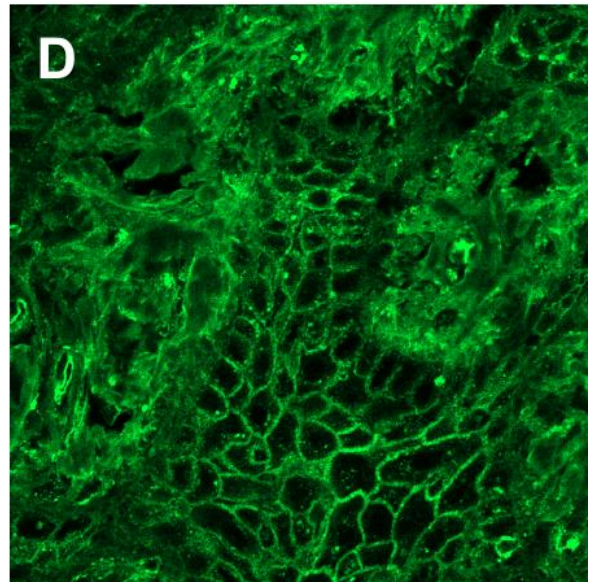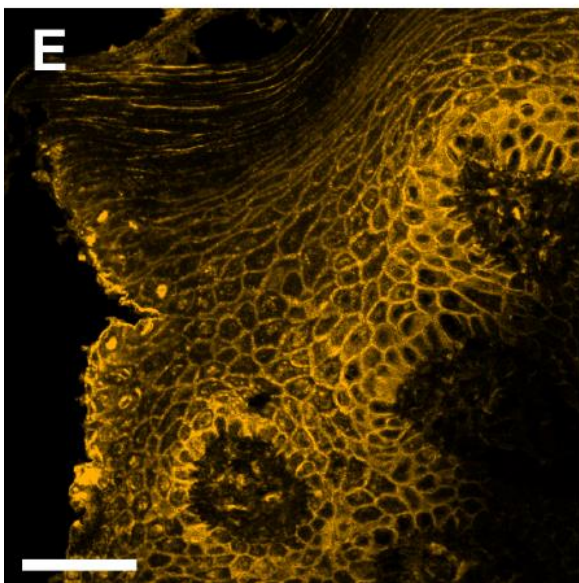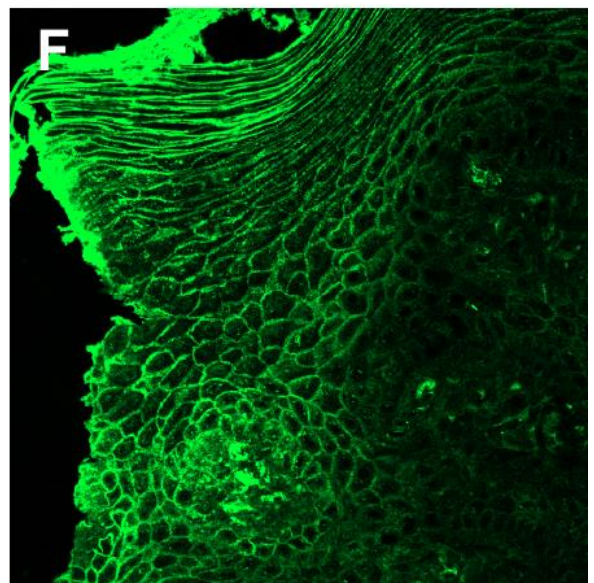

**Figure S1.** E-cadherin,  $\beta$ -actin and syndecan-1 staining patterns (yellow) in normal oral mucosa; 40 $\times$  objective. (A) and (B): same field with E-cadherin and WGA (green) staining, respectively. (C,D): same field with  $\beta$ -actin and WGA staining, respectively. (E,F): same field with syndecan-1 and WGA staining, respectively. Scale bars: (A–D) 20  $\mu$ m; (E,F) 20  $\mu$ m.
